# Supplementary material
Source: PubMed Central journal article supplement (PMC6321800)
Supplement: kwy212_purdue-smithe_web_material_final.pdf [file kwy212_purdue-smithe_web_material_final.pdf]

**Web Table 1.** Hazard ratios and 95% confidence intervals for early menopause by category of baseline (1991) intake of individual dairy foods, Nurses' Health Study II, 1991–2011

| Dairy Food and<br>No. of Servings | No. of<br>Cases | Model 1 <sup>a</sup> |            | Model 2 <sup>b</sup> |            | Model 3 <sup>c</sup> |            |
|-----------------------------------|-----------------|----------------------|------------|----------------------|------------|----------------------|------------|
|                                   |                 | HR                   | 95% CI     | HR                   | 95% CI     | HR                   | 95% CI     |
| Skim milk                         |                 |                      |            |                      |            |                      |            |
| Almost never                      | 324             | 1                    | Referent   | 1                    | Referent   | 1                    | Referent   |
| 1–3/month                         | 168             | 0.97                 | 0.80, 1.17 | 1.00                 | 0.83, 1.20 | 1.00                 | 0.82, 1.20 |
| 1/week                            | 161             | 1.08                 | 0.89, 1.30 | 1.12                 | 0.92, 1.35 | 1.11                 | 0.92, 1.35 |
| 2–4/week                          | 322             | 0.81                 | 0.69, 0.94 | 0.85                 | 0.73, 0.99 | 0.85                 | 0.72, 0.99 |
| 5–6/week                          | 161             | 0.81                 | 0.67, 0.98 | 0.85                 | 0.71, 1.03 | 0.84                 | 0.69, 1.02 |
| 1/day                             | 471             | 0.83                 | 0.72, 0.95 | 0.89                 | 0.77, 1.03 | 0.88                 | 0.76, 1.01 |
| 2–3/day                           | 399             | 0.74                 | 0.64, 0.86 | 0.83                 | 0.71, 0.96 | 0.79                 | 0.67, 0.93 |
| ≥4/day                            | 43              | 0.91                 | 0.66, 1.25 | 1.03                 | 0.75, 1.42 | 0.96                 | 0.69, 1.35 |
| <i>P</i> for trend                |                 |                      | <0.01      |                      | 0.04       |                      | 0.02       |
| Whole milk                        |                 |                      |            |                      |            |                      |            |
| Almost never                      | 1,656           | 1                    | Referent   | 1                    | Referent   | 1                    | Referent   |
| 1–3/month                         | 171             | 1.05                 | 0.90, 1.23 | 1.02                 | 0.87, 1.20 | 1.02                 | 0.87, 1.20 |
| 1–4/week                          | 146             | 1.08                 | 0.91, 1.28 | 1.03                 | 0.87, 1.22 | 1.03                 | 0.87, 1.22 |
| ≥5/week                           | 76              | 1.05                 | 0.83, 1.32 | 0.98                 | 0.78, 1.23 | 0.98                 | 0.78, 1.23 |
| <i>P</i> for trend                |                 |                      | 0.19       |                      | 0.46       |                      | 0.46       |
| Cream                             |                 |                      |            |                      |            |                      |            |
| Almost never                      | 1,441           | 1                    | Referent   | 1                    | Referent   | 1                    | Referent   |
| 1–3/month                         | 297             | 0.95                 | 0.84, 1.08 | 0.97                 | 0.85, 1.10 | 0.97                 | 0.85, 1.10 |
| 1/week                            | 67              | 0.99                 | 0.77, 1.27 | 1.01                 | 0.79, 1.29 | 1.01                 | 0.79, 1.29 |
| 2–4/week                          | 70              | 1.06                 | 0.84, 1.35 | 1.06                 | 0.84, 1.35 | 1.06                 | 0.84, 1.35 |
| ≥5/week                           | 174             | 1.05                 | 0.90, 1.23 | 0.99                 | 0.85, 1.16 | 0.99                 | 0.85, 1.16 |
| <i>P</i> for trend                |                 |                      | 0.26       |                      | 0.97       |                      | 0.96       |
| Frozen yogurt/sherbet             |                 |                      |            |                      |            |                      |            |
| Almost never                      | 682             | 1                    | Referent   | 1                    | Referent   | 1                    | Referent   |
| 1–3/month                         | 739             | 0.96                 | 0.86, 1.06 | 1.00                 | 0.90, 1.11 | 1.00                 | 0.90, 1.11 |
| 1/week                            | 315             | 0.94                 | 0.82, 1.07 | 1.00                 | 0.87, 1.14 | 1.00                 | 0.87, 1.14 |
| ≥2/week                           | 313             | 0.94                 | 0.82, 1.07 | 0.99                 | 0.87, 1.13 | 0.99                 | 0.87, 1.14 |
| <i>P</i> for trend                |                 |                      | 0.35       |                      | 0.61       |                      | 0.61       |
| Ice cream                         |                 |                      |            |                      |            |                      |            |
| Almost never                      | 611             | 1                    | Referent   | 1                    | Referent   | 1                    | Referent   |

|                               |       |      |            |      |            |      |            |
|-------------------------------|-------|------|------------|------|------------|------|------------|
| 1-3/month                     | 862   | 1.01 | 0.91, 1.11 | 1.06 | 0.95, 1.17 | 1.06 | 0.95, 1.18 |
| 1/week                        | 346   | 0.99 | 0.87, 1.13 | 1.08 | 0.94, 1.23 | 1.08 | 0.94, 1.23 |
| ≥2/week                       | 230   | 0.89 | 0.76, 1.03 | 0.98 | 0.84, 1.15 | 0.98 | 0.84, 1.14 |
| <i>P</i> for trend            |       |      | 0.09       |      | 0.47       |      | 0.47       |
| <b>Yogurt</b>                 |       |      |            |      |            |      |            |
| Almost never                  | 956   | 1    | Referent   | 1    | Referent   | 1    | Referent   |
| 1-3/month                     | 538   | 0.86 | 0.77, 0.95 | 0.9  | 0.80, 1.00 | 0.89 | 0.80, 1.00 |
| 1/week                        | 251   | 0.94 | 0.81, 1.07 | 0.99 | 0.86, 1.14 | 0.99 | 0.86, 1.13 |
| ≥2/week                       | 304   | 0.83 | 0.73, 0.95 | 0.86 | 0.75, 0.98 | 0.86 | 0.75, 0.98 |
| <i>P</i> for trend            |       |      | 0.13       |      | 0.19       |      | 0.19       |
| <b>Cottage/ricotta cheese</b> |       |      |            |      |            |      |            |
| Almost never                  | 933   | 1    | Referent   | 1    | Referent   | 1    | Referent   |
| 1-3/month                     | 742   | 0.94 | 0.86, 1.04 | 0.98 | 0.89, 1.08 | 0.98 | 0.89, 1.08 |
| 1/week                        | 216   | 0.94 | 0.81, 1.09 | 0.99 | 0.85, 1.15 | 0.99 | 0.85, 1.15 |
| ≥2/week                       | 158   | 1.04 | 0.88, 1.23 | 1.08 | 0.91, 1.28 | 1.08 | 0.91, 1.28 |
| <i>P</i> for trend            |       |      | 0.92       |      | 0.62       |      | 0.61       |
| <b>Cream cheese</b>           |       |      |            |      |            |      |            |
| Almost never                  | 1,109 | 1    | Referent   | 1    | Referent   | 1    | Referent   |
| 1-3/month                     | 654   | 0.93 | 0.84, 1.02 | 0.96 | 0.87, 1.05 | 0.96 | 0.87, 1.05 |
| 1/week                        | 172   | 0.89 | 0.76, 1.05 | 0.94 | 0.80, 1.10 | 0.94 | 0.80, 1.10 |
| ≥2/week                       | 114   | 0.94 | 0.78, 1.14 | 0.97 | 0.80, 1.17 | 0.97 | 0.80, 1.18 |
| <i>P</i> for trend            |       |      | 0.31       |      | 0.47       |      | 0.48       |
| <b>Low-fat cheese</b>         |       |      |            |      |            |      |            |
| Almost never                  | 1,623 | 1    | Referent   | 1    | Referent   | 1    | Referent   |
| 1-3/month                     | 76    | 1.08 | 0.86, 1.36 | 1.06 | 0.84, 1.34 | 1.06 | 0.84, 1.34 |
| 1/week                        | 107   | 1.03 | 0.85, 1.26 | 1.03 | 0.84, 1.25 | 1.03 | 0.84, 1.25 |
| ≥2/week                       | 243   | 0.98 | 0.86, 1.12 | 1.00 | 0.87, 1.15 | 1.00 | 0.87, 1.15 |
| <i>P</i> for trend            |       |      | 0.97       |      | 0.79       |      | 0.78       |
| <b>High-fat cheese</b>        |       |      |            |      |            |      |            |
| Almost never                  | 856   | 1    | Referent   | 1    | Referent   | 1    | Referent   |
| 1-3/month                     | 145   | 0.94 | 0.79, 1.12 | 0.93 | 0.77, 1.11 | 0.92 | 0.77, 1.10 |
| 1/week                        | 268   | 1.05 | 0.92, 1.21 | 1.07 | 0.93, 1.23 | 1.07 | 0.93, 1.23 |
| ≥2/week                       | 780   | 1.02 | 0.92, 1.12 | 1.07 | 0.97, 1.19 | 1.07 | 0.97, 1.19 |
| <i>P</i> for trend            |       |      | 0.99       |      | 0.46       |      | 0.44       |

**Butter**

|                    |       |      |            |      |            |      |            |
|--------------------|-------|------|------------|------|------------|------|------------|
| Almost never       | 1,284 | 1    | Referent   | 1    | Referent   | 1    | Referent   |
| 1–3/month          | 420   | 1.02 | 0.91, 1.14 | 1.00 | 0.89, 1.11 | 1.00 | 0.89, 1.11 |
| ≥1/week            | 345   | 1.01 | 0.89, 1.14 | 0.97 | 0.86, 1.09 | 0.97 | 0.86, 1.09 |
| <i>P</i> for trend |       |      | 0.92       |      | 0.78       |      | 0.78       |

---

Abbreviations: BMI, body mass index; CI, confidence interval; HR, hazard ratio.

<sup>a</sup> Model 1 adjusted for age (months; continuous).

<sup>b</sup> Model 2 adjusted for age (months; continuous), pack-years of smoking ( $\leq 10$ , 11–20, or  $\geq 21$ ), BMI (weight (kg)/height (m)<sup>2</sup>; <18.5, 18.5–24.9, 25–29.9, or  $\geq 30$ ), age at menarche (years; continuous), parity (nulliparous, 1–2, or  $\geq 3$ ), breastfeeding duration (months; continuous), percentage of total kilocalories derived from vegetable protein (quintiles 1–3 or 4+5), alcohol intake (<10 g/day or  $\geq 10$  g/day), and current multivitamin use (yes or no).

<sup>c</sup> Model 3 adjusted for model 2 covariates + total vitamin D intake (IU/day; continuous) and total calcium intake (mg/day; continuous).
